# Supplementary material for: Anion- and temperature-dependent assembly, crystal structures and luminescence properties of six new Cd(ii) coordination polymers based on 2,3,5,6-tetrakis(2-pyridyl)pyrazine
Source: Royal Society of Chemistry journal article supplement (doi:10.1039/c6ce00853d), 2016-01-01
Supplement: c6ce00853d1.pdf [file c6ce00853d1.pdf]

# Anion- and temperature-dependent assembly, crystal structures and luminescent properties of six new Cd(II) coordination polymers based on 2,3,5,6-tetrakis(2-pyridyl)pyrazine

Jun Wang,<sup>ab</sup> Song-Liang Cai,<sup>\*a</sup> Kai Zhang,<sup>a</sup> Chao-Jie Li,<sup>a</sup> Ying Feng,<sup>a</sup> Jun Fan,<sup>ac</sup> Sheng-Run Zheng,<sup>a</sup> and Wei-Guang Zhang<sup>\*ac</sup>

<sup>a</sup>School of Chemistry and Environment, South China Normal University, Guangzhou, 510006, P. R. China. E-mail: [songliangcai@m.scnu.edu.cn](mailto:songliangcai@m.scnu.edu.cn); [wgzhang@scnu.edu.cn](mailto:wgzhang@scnu.edu.cn); Fax: +86-20-39347768

<sup>b</sup>Zhongshan Polytechnic, Zhongshan, 528403, P. R. China

<sup>c</sup>Guangdong YanJie Pharmatech Co. Ltd., Guangzhou, 510663, P. R. China

## Supporting information

Table S1 Selected bond lengths [Å] and angles[°] for the compounds 1-6.<sup>a</sup>

| Compound 1        |            |                    |            |
|-------------------|------------|--------------------|------------|
| Cd(1)-N(4)        | 2.314(3)   | Cd(1)-N(2)         | 2.426(3)   |
| Cd(1)-N(3)        | 2.390(3)   | Cd(1)-N(4)#1       | 2.443(3)   |
| Cd(1)-N(1)        | 2.403(3)   | Cd(1)-Cl(1)        | 2.4834(11) |
| N(4)-Cd(1)-N(3)   | 96.56(12)  | N(1)-Cd(1)-N(4)#1  | 85.26(11)  |
| N(4)-Cd(1)-N(1)   | 124.95(12) | N(2)-Cd(1)-N(4)#1  | 78.92(10)  |
| N(3)-Cd(1)-N(1)   | 136.05(10) | N(4)-Cd(1)-Cl(1)   | 96.20(8)   |
| N(4)-Cd(1)-N(2)   | 151.06(11) | N(3)-Cd(1)-Cl(1)   | 99.66(9)   |
| N(3)-Cd(1)-N(2)   | 67.99(9)   | N(1)-Cd(1)-Cl(1)   | 90.36(8)   |
| N(1)-Cd(1)-N(2)   | 68.37(9)   | N(2)-Cd(1)-Cl(1)   | 110.12(7)  |
| N(4)-Cd(1)-N(4)#1 | 77.11(12)  | N(4)#1-Cd(1)-Cl(1) | 167.70(9)  |
| N(3)-Cd(1)-N(4)#1 | 91.42(12)  |                    |            |
| Compound 2        |            |                    |            |
| Cd(1)-N(5)        | 2.367(3)   | Cd(1)-O(1)         | 2.399(3)   |
| Cd(1)-N(3)        | 2.367(3)   | Cd(1)-N(2)         | 2.411(2)   |
| Cd(1)-N(1)        | 2.376(3)   | Cd(1)-O(2)         | 2.431(3)   |
| Cd(1)-N(7)#1      | 2.357(3)   |                    |            |

|                   |            |                   |            |
|-------------------|------------|-------------------|------------|
| N(7)#1-Cd(1)-N(5) | 173.88(10) | N(5)-Cd(1)-N(2)   | 80.76(10)  |
| N(7)#1-Cd(1)-N(3) | 92.18(10)  | N(3)-Cd(1)-N(2)   | 68.18(9)   |
| N(5)-Cd(1)-N(3)   | 87.52(10)  | N(1)-Cd(1)-N(2)   | 69.28(9)   |
| N(7)#1-Cd(1)-N(1) | 84.60(11)  | O(1)-Cd(1)-N(2)   | 151.52(9)  |
| N(5)-Cd(1)-N(1)   | 91.46(10)  | N(7)#1-Cd(1)-O(2) | 88.49(11)  |
| N(3)-Cd(1)-N(1)   | 137.04(9)  | N(5)-Cd(1)-O(2)   | 95.97(11)  |
| N(7)#1-Cd(1)-O(1) | 92.80(11)  | N(3)-Cd(1)-O(2)   | 136.14(10) |
| N(5)-Cd(1)-O(1)   | 93.25(11)  | N(1)-Cd(1)-O(2)   | 86.70(10)  |
| N(3)-Cd(1)-O(1)   | 83.84(9)   | O(1)-Cd(1)-O(2)   | 52.34(10)  |
| N(1)-Cd(1)-O(1)   | 139.03(9)  | N(2)-Cd(1)-O(2)   | 155.57(10) |
| N(7)#1-Cd(1)-N(2) | 93.44(10)  |                   |            |

---

**Compound 3**

|                   |            |                   |            |
|-------------------|------------|-------------------|------------|
| Cd(1)-N(4)        | 2.348(4)   | Cd(1)-N(6)#1      | 2.407(4)   |
| Cd(1)-O(1)        | 2.354(3)   | Cd(1)-N(3)        | 2.415(3)   |
| Cd(1)-O(2)        | 2.403(3)   | Cd(1)-N(2)        | 2.455(3)   |
| Cd(1)-N(1)        | 2.405(3)   |                   |            |
| N(4)-Cd(1)-O(1)   | 97.50(12)  | O(1)-Cd(1)-N(3)   | 139.56(10) |
| N(4)-Cd(1)-O(2)   | 104.78(12) | O(2)-Cd(1)-N(3)   | 85.47(9)   |
| O(1)-Cd(1)-O(2)   | 54.53(9)   | N(1)-Cd(1)-N(3)   | 134.80(9)  |
| N(4)-Cd(1)-N(1)   | 93.25(12)  | N(6)#1-Cd(1)-N(3) | 90.65(10)  |
| O(1)-Cd(1)-N(1)   | 85.37(10)  | N(4)-Cd(1)-N(2)   | 82.25(11)  |
| O(2)-Cd(1)-N(1)   | 137.34(9)  | O(1)-Cd(1)-N(2)   | 152.46(10) |
| N(4)-Cd(1)-N(6)#1 | 168.84(12) | O(2)-Cd(1)-N(2)   | 152.24(10) |
| O(1)-Cd(1)-N(6)#1 | 91.79(11)  | N(1)-Cd(1)-N(2)   | 67.20(9)   |
| O(2)-Cd(1)-N(6)#1 | 85.64(11)  | N(6)#1-Cd(1)-N(2) | 86.66(10)  |
| N(1)-Cd(1)-N(6)#1 | 81.31(11)  | N(3)-Cd(1)-N(2)   | 67.98(9)   |
| N(4)-Cd(1)-N(3)   | 86.29(11)  |                   |            |

---

**Compound 4**

|                      |            |                  |            |
|----------------------|------------|------------------|------------|
| Cd(1)-N(7)           | 2.323(5)   | Cd(2)-N(4)       | 2.312(4)   |
| Cd(1)-N(10)          | 2.363(5)   | Cd(2)-N(2)       | 2.422(4)   |
| Cd(1)-N(4)           | 2.366(4)   | Cd(2)-N(1)       | 2.422(4)   |
| Cd(2)-N(12)          | 2.261(5)   | Cd(2)-N(3)       | 2.449(5)   |
| Cd(2)-N(7)           | 2.300(5)   |                  |            |
| N(7)#1-Cd(1)-N(7)    | 101.2(3)   | N(12)-Cd(2)-N(7) | 90.41(19)  |
| N(7)#1-Cd(1)-N(10)#1 | 87.79(18)  | N(12)-Cd(2)-N(4) | 167.17(18) |
| N(7)-Cd(1)-N(10)#1   | 169.26(17) | N(7)-Cd(2)-N(4)  | 78.04(16)  |
| N(7)#1-Cd(1)-N(10)   | 169.26(17) | N(12)-Cd(2)-N(2) | 104.44(17) |
| N(7)-Cd(1)-N(10)     | 87.79(18)  | N(7)-Cd(2)-N(2)  | 152.55(16) |
| N(10)#1-Cd(1)-N(10)  | 84.0(3)    | N(4)-Cd(2)-N(2)  | 88.39(15)  |
| N(7)#1-Cd(1)-N(4)    | 95.67(16)  | N(12)-Cd(2)-N(1) | 84.39(19)  |
| N(7)-Cd(1)-N(4)      | 76.51(16)  | N(7)-Cd(2)-N(1)  | 137.29(16) |
| N(10)#1-Cd(1)-N(4)   | 96.86(16)  | N(4)-Cd(2)-N(1)  | 100.24(16) |
| N(10)-Cd(1)-N(4)     | 92.18(17)  | N(2)-Cd(2)-N(1)  | 68.24(14)  |

|                      |           |                  |            |
|----------------------|-----------|------------------|------------|
| N(7)#1-Cd(1)-N(4)#1  | 76.50(16) | N(12)-Cd(2)-N(3) | 88.85(18)  |
| N(7)-Cd(1)-N(4)#1    | 95.67(16) | N(7)-Cd(2)-N(3)  | 92.53(16)  |
| N(10)#1-Cd(1)-N(4)#1 | 92.18(17) | N(4)-Cd(2)-N(3)  | 97.14(16)  |
| N(10)-Cd(1)-N(4)#1   | 96.86(16) | N(2)-Cd(2)-N(3)  | 65.35(14)  |
| N(4)-Cd(1)-N(4)#1    | 167.8(2)  | N(1)-Cd(2)-N(3)  | 129.56(15) |

---

**Compound 5**

---

|                 |            |                    |            |
|-----------------|------------|--------------------|------------|
| Cd(1)-N(8)      | 2.290(4)   | Cd(2)-N(10)        | 2.306(4)   |
| Cd(1)-N(4)      | 2.313(4)   | Cd(2)-N(4)#1       | 2.338(3)   |
| Cd(1)-N(1)      | 2.386(3)   | Cd(2)-N(13)        | 2.369(3)   |
| Cd(1)-O(2)      | 2.404(3)   | Cd(2)-O(5)         | 2.370(3)   |
| Cd(1)-N(2)      | 2.436(3)   | Cd(2)-O(4)         | 2.432(3)   |
| Cd(1)-N(3)      | 2.447(3)   | Cd(2)-N(11)        | 2.435(3)   |
| Cd(1)-O(1)      | 2.464(3)   | Cd(2)-N(12)        | 2.435(3)   |
| N(8)-Cd(1)-N(4) | 173.02(14) | N(10)-Cd(2)-N(4)#1 | 173.85(13) |
| N(8)-Cd(1)-N(1) | 89.96(14)  | N(10)-Cd(2)-N(13)  | 89.16(14)  |
| N(4)-Cd(1)-N(1) | 95.62(13)  | N(4)#1-Cd(2)-N(13) | 93.80(13)  |
| N(8)-Cd(1)-O(2) | 83.09(13)  | N(10)-Cd(2)-O(5)   | 87.83(14)  |
| N(4)-Cd(1)-O(2) | 92.96(12)  | N(4)#1-Cd(2)-O(5)  | 97.54(13)  |
| N(1)-Cd(1)-O(2) | 87.35(12)  | N(13)-Cd(2)-O(5)   | 90.16(12)  |
| N(8)-Cd(1)-N(2) | 100.49(13) | N(10)-Cd(2)-O(4)   | 94.84(14)  |
| N(4)-Cd(1)-N(2) | 85.55(12)  | N(4)#1-Cd(2)-O(4)  | 86.07(13)  |
| N(1)-Cd(1)-N(2) | 67.71(11)  | N(13)-Cd(2)-O(4)   | 142.65(11) |
| O(2)-Cd(1)-N(2) | 154.69(12) | O(5)-Cd(2)-O(4)    | 53.03(11)  |
| N(8)-Cd(1)-N(3) | 88.76(14)  | N(10)-Cd(2)-N(11)  | 83.60(13)  |
| N(4)-Cd(1)-N(3) | 90.34(12)  | N(4)#1-Cd(2)-N(11) | 90.48(12)  |
| N(1)-Cd(1)-N(3) | 134.20(11) | N(13)-Cd(2)-N(11)  | 134.30(11) |
| O(2)-Cd(1)-N(3) | 137.75(12) | O(5)-Cd(2)-N(11)   | 134.28(12) |
| N(2)-Cd(1)-N(3) | 67.56(11)  | O(4)-Cd(2)-N(11)   | 83.03(11)  |
| N(8)-Cd(1)-O(1) | 83.75(14)  | N(10)-Cd(2)-N(12)  | 93.40(13)  |
| N(4)-Cd(1)-O(1) | 89.28(13)  | N(4)#1-Cd(2)-N(12) | 82.73(12)  |
| N(1)-Cd(1)-O(1) | 139.71(12) | N(13)-Cd(2)-N(12)  | 68.18(11)  |
| O(2)-Cd(1)-O(1) | 52.42(12)  | O(5)-Cd(2)-N(12)   | 158.27(12) |
| N(2)-Cd(1)-O(1) | 152.55(11) | O(4)-Cd(2)-N(12)   | 148.06(11) |
| N(3)-Cd(1)-O(1) | 85.56(12)  | N(11)-Cd(2)-N(12)  | 67.31(11)  |

---

**Compound 6**

---

|                   |            |                 |            |
|-------------------|------------|-----------------|------------|
| Cd(1)-N(7)#1      | 2.299(5)   | Cd(2)-N(4)      | 2.225(4)   |
| Cd(1)-N(4)        | 2.318(4)   | Cd(2)-N(10)     | 2.239(5)   |
| Cd(1)-N(1)        | 2.372(4)   | Cd(2)-N(7)      | 2.301(5)   |
| Cd(1)-N(3)        | 2.375(4)   | Cd(2)-N(12)#2   | 2.352(5)   |
| Cd(1)-N(2)        | 2.448(4)   | Cd(2)-O(2)#3    | 2.395(4)   |
| Cd(1)-O(2)        | 2.466(4)   | Cd(2)-O(1)      | 2.474(4)   |
| Cd(1)-O(1)        | 2.480(4)   |                 |            |
| N(7)#1-Cd(1)-N(4) | 174.80(17) | N(3)-Cd(1)-O(1) | 128.34(13) |

|                   |            |                      |            |
|-------------------|------------|----------------------|------------|
| N(7)#1-Cd(1)-N(1) | 86.88(16)  | N(2)-Cd(1)-O(1)      | 155.25(14) |
| N(4)-Cd(1)-N(1)   | 90.26(16)  | O(2)-Cd(1)-O(1)      | 52.54(13)  |
| N(7)#1-Cd(1)-N(3) | 100.06(16) | N(4)-Cd(2)-N(10)     | 160.87(19) |
| N(4)-Cd(1)-N(3)   | 85.04(15)  | N(4)-Cd(2)-N(7)      | 93.09(17)  |
| N(1)-Cd(1)-N(3)   | 134.54(13) | N(10)-Cd(2)-N(7)     | 102.7(2)   |
| N(7)#1-Cd(1)-N(2) | 89.59(16)  | N(4)-Cd(2)-N(12)#2   | 95.00(17)  |
| N(4)-Cd(1)-N(2)   | 93.30(14)  | N(10)-Cd(2)-N(12)#2  | 96.00(18)  |
| N(1)-Cd(1)-N(2)   | 67.21(13)  | N(7)-Cd(2)-N(12)#2   | 88.88(18)  |
| N(3)-Cd(1)-N(2)   | 67.97(14)  | N(4)-Cd(2)-O(2)#3    | 86.98(15)  |
| N(7)#1-Cd(1)-O(2) | 75.41(15)  | N(10)-Cd(2)-O(2)#3   | 86.24(17)  |
| N(4)-Cd(1)-O(2)   | 103.62(14) | N(7)-Cd(2)-O(2)#3    | 76.79(15)  |
| N(1)-Cd(1)-O(2)   | 133.37(13) | N(12)#2-Cd(2)-O(2)#3 | 165.63(16) |
| N(3)-Cd(1)-O(2)   | 91.39(14)  | N(4)-Cd(2)-O(1)      | 73.91(14)  |
| N(2)-Cd(1)-O(2)   | 152.21(14) | N(10)-Cd(2)-O(1)     | 90.55(19)  |
| N(7)#1-Cd(1)-O(1) | 103.50(16) | N(7)-Cd(2)-O(1)      | 166.73(15) |
| N(4)-Cd(1)-O(1)   | 72.26(14)  | N(12)#2-Cd(2)-O(1)   | 89.59(17)  |
| N(1)-Cd(1)-O(1)   | 92.28(13)  | O(2)#3-Cd(2)-O(1)    | 104.61(14) |

<sup>a</sup>Symmetry transformations used to generate equivalent atoms: #1 -x+1,-y+1,-z+1 for compound **1**; #1 x-1,y,z for compound **2**; #1 -x+1/2,y+1/2,-z+3/2 for compound **3**; #1 -x+1,y,-z+5/2 for compound **4**; #1 x,-y+1,z+1/2 for compound **5**; #1 x,-y+1/2,z+1/2 #2 -x+2,-y+1,-z+1 #3 x,-y+1/2,z-1/2 for compound **6**.

Table S2 Selected details of the hydrogen bonds in compounds **2-3**.

|                           | symmetry code | $d(\text{D-H})/\text{\AA}$ | $d(\text{H}\cdots\text{A})/\text{\AA}$ | $d(\text{D}\cdots\text{A})/\text{\AA}$ | $\angle\text{D-H}\cdots\text{A}/^\circ$ |
|---------------------------|---------------|----------------------------|----------------------------------------|----------------------------------------|-----------------------------------------|
| <b>Compound 2</b>         |               |                            |                                        |                                        |                                         |
| C(9)-H(9) $\cdots$ O(3)   | x,y-1,z       | 0.93                       | 2.53                                   | 3.161(5)                               | 125                                     |
| C(10)-H(10) $\cdots$ O(3) | x,y-1,z       | 0.93                       | 2.66                                   | 3.221(5)                               | 119                                     |
| <b>Compound 3</b>         |               |                            |                                        |                                        |                                         |
| O(3)-H(3A) $\cdots$ O(2)  | x, y, z       | 0.85                       | 2.00                                   | 2.844(4)                               | 178.5                                   |
| O(3)-H(3B) $\cdots$ N(4)  | -x,-y+1,-z+1  | 0.85                       | 2.16                                   | 3.007(5)                               | 175.7                                   |

Table S3. Structural comparison of the reported Cd-tppz compounds.<sup>b</sup>

| Compound                                           | $[\text{Cd}_2(\text{tppz})\text{Cl}_4]^{11\text{h}}$ | $[\text{Cd}_2(\text{tppz})(\text{NO}_3)_4(\text{MeOH})_2]^{11\text{f}}$ | $\{[\text{Cd}_2(\text{tppz})\text{Cl}_4] \cdot \text{EG}\}_n^{11\text{g}}$ | $\{[\text{Cd}_2(\text{N}_3)_2(\text{tppz})(\text{NO}_3)_2] \cdot 2\text{MeOH}\}_n^{11\text{b}}$ | $\{[\text{Cd}_2(\text{N}_3)_4(\text{tppz})]\}_n^{11\text{b}}$ | $\{[\text{Cd}_2(\text{tppz})(\text{pic})\text{Cl}_3]\}_n^{11\text{h}}$ |
|----------------------------------------------------|------------------------------------------------------|-------------------------------------------------------------------------|----------------------------------------------------------------------------|-------------------------------------------------------------------------------------------------|---------------------------------------------------------------|------------------------------------------------------------------------|
| Cd(II) salt used for synthesis                     | $\text{CdCl}_2$                                      | $\text{Cd}(\text{NO}_3)_2$                                              | $\text{CdCl}_2$                                                            | $\text{Cd}(\text{NO}_3)_2$                                                                      | $\text{Cd}(\text{NO}_3)_2$                                    | $\text{CdCl}_2$                                                        |
| Main ligand used for synthesis                     | pmpc                                                 | tppz                                                                    | tppz                                                                       | tppz                                                                                            | tppz                                                          | pmpc                                                                   |
| Coordination mode of the tppz ligand               | bis-tridentate $\mu_2$ -bridge                       | bis-tridentate $\mu_2$ -bridge                                          | bis-tridentate $\mu_2$ -bridge                                             | bis-tridentate $\mu_2$ -bridge                                                                  | bis-tridentate $\mu_2$ -bridge                                | bis-tridentate $\mu_2$ -bridge                                         |
| Coordination number of Cd(II) ions                 | 5-coordinated                                        | 7-coordinated                                                           | 6-coordinated                                                              | 7-coordinated                                                                                   | 7-coordinated                                                 | 6- and 7-coordinated                                                   |
| Anion of the Cd(II) salt remained in the structure | $\text{Cl}^-$                                        | $\text{NO}_3^-$                                                         | $\text{Cl}^-$                                                              | $\text{NO}_3^-$                                                                                 | None                                                          | $\text{Cl}^-$                                                          |
| Coordination mode of the anion of the Cd(II) salt  | $\mu_1$                                              | $\mu_1$                                                                 | $\mu_1$ and $\mu_2$                                                        | $\mu_1$                                                                                         | None                                                          | $\mu_2$ and $\mu_3$                                                    |
| Coordination mode of the azide co-ligand           | None                                                 | None                                                                    | None                                                                       | $\mu_{1,1}\text{-N}_3^-$                                                                        | $\mu_{1,1}\text{-N}_3^-$ and $\mu_{1,3}\text{-N}_3^-$         | None                                                                   |
| Dimensionality / topology of the structure         | 0D dinuclear cluster                                 | 0D dinuclear cluster                                                    | 1D chain with loops and rods topology                                      | 1D chain with loops and rods topology                                                           | 2D (6,3) network                                              | 2D (4,4) network                                                       |

<sup>b</sup> EG = ethylene glycol; pic = picolinate; pmpc = *N*-(2-pyridyl-methyl) pyridine-2-carbalimine.

References 11b and 11f – 11h are provided in the main text.

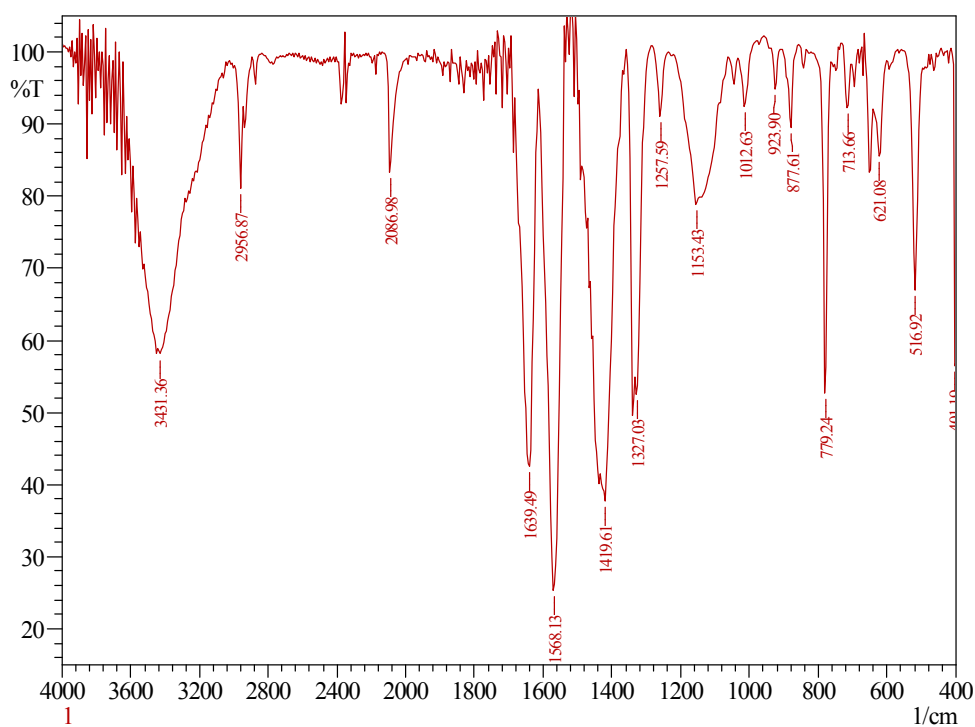

Figure S1. FT-IR spectrum of compound 1.

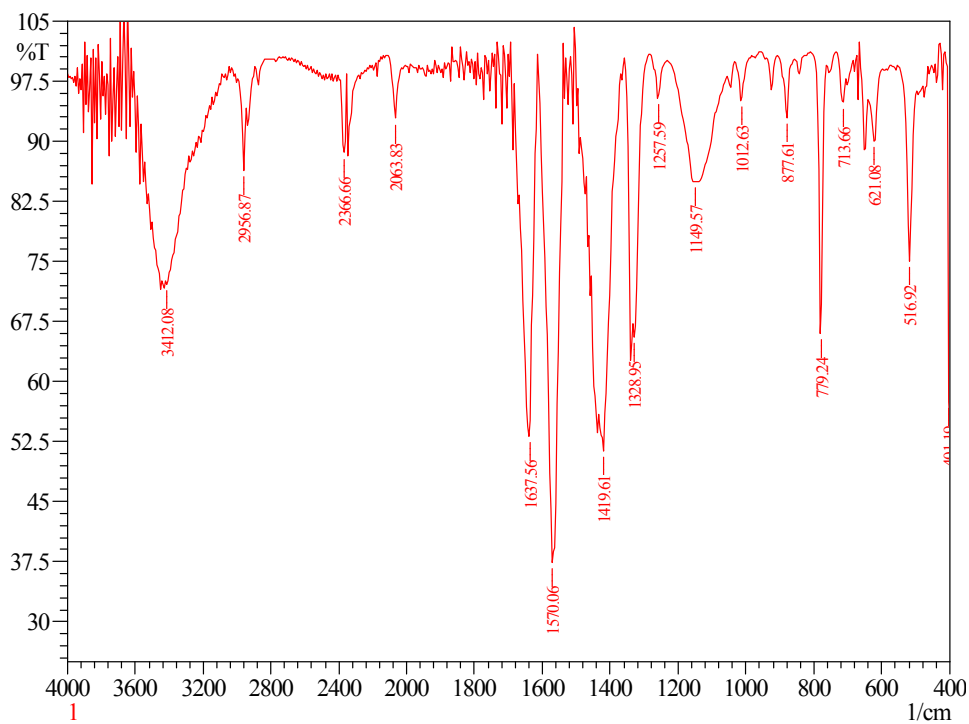

Figure S2. FT-IR spectrum of compound 2.

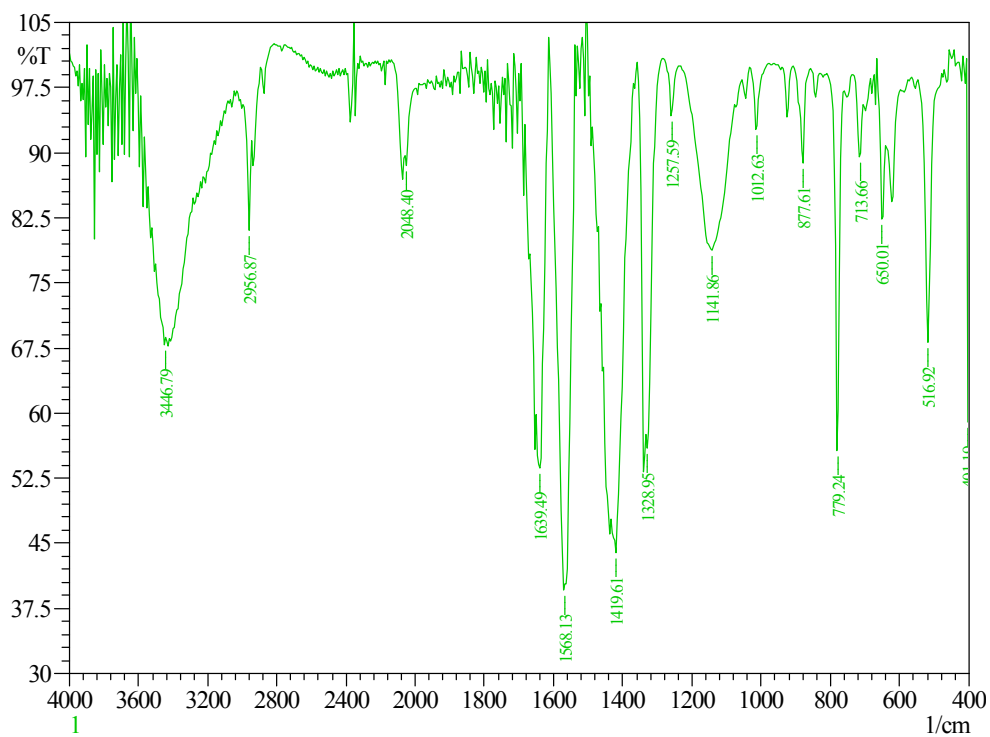

Figure S3. FT-IR spectrum of compound 3.

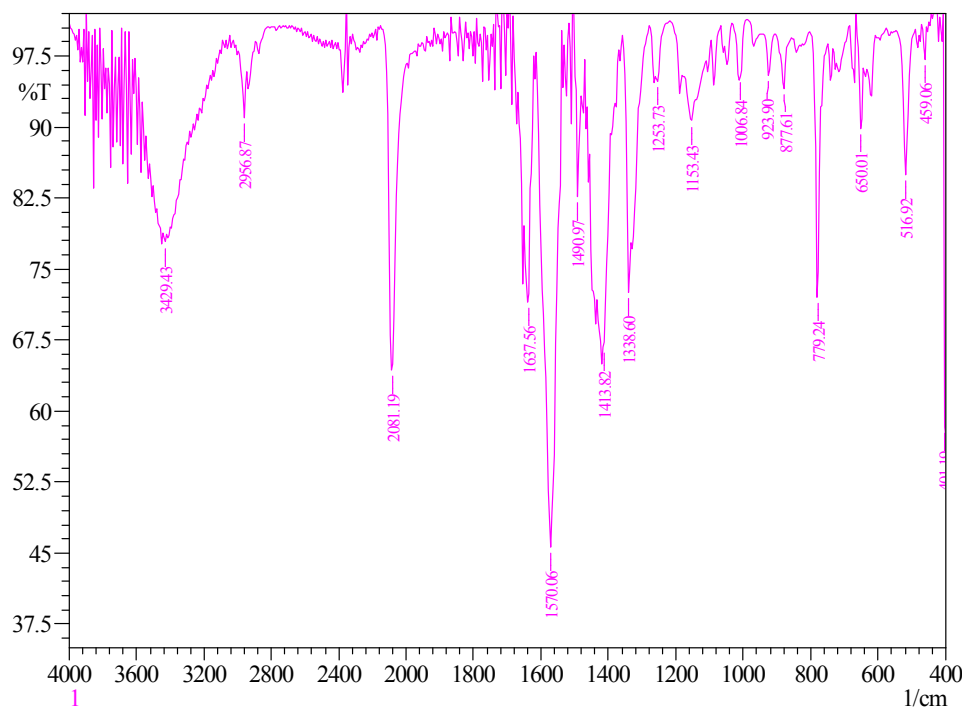

Figure S4. FT-IR spectrum of compound 4.

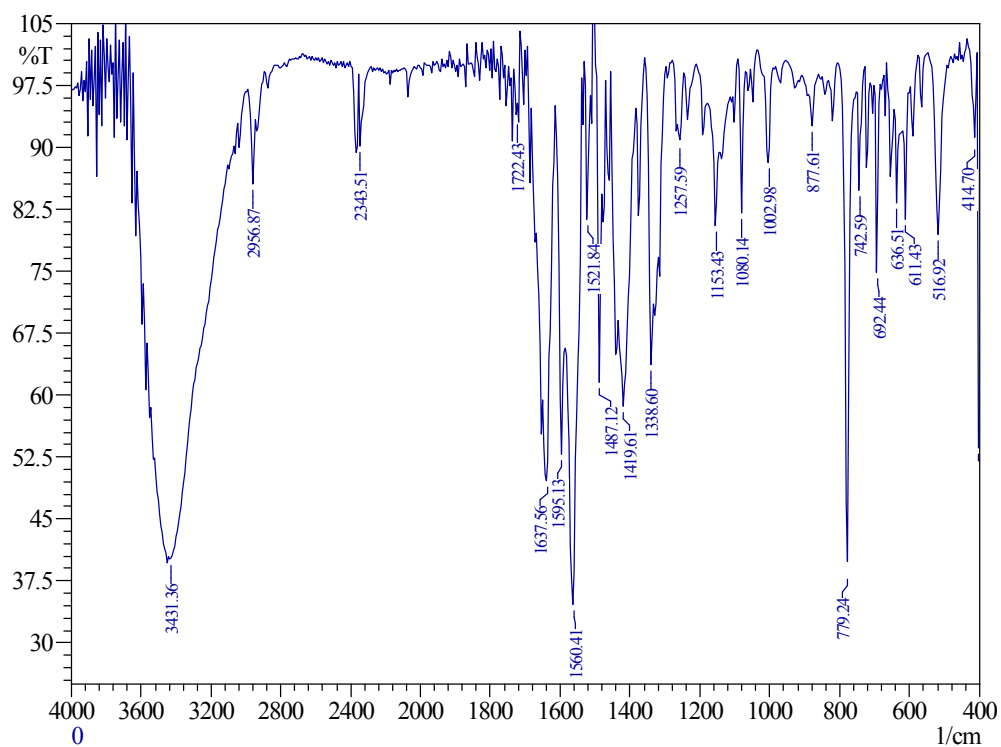

Figure S5. FT-IR spectrum of compound 5.

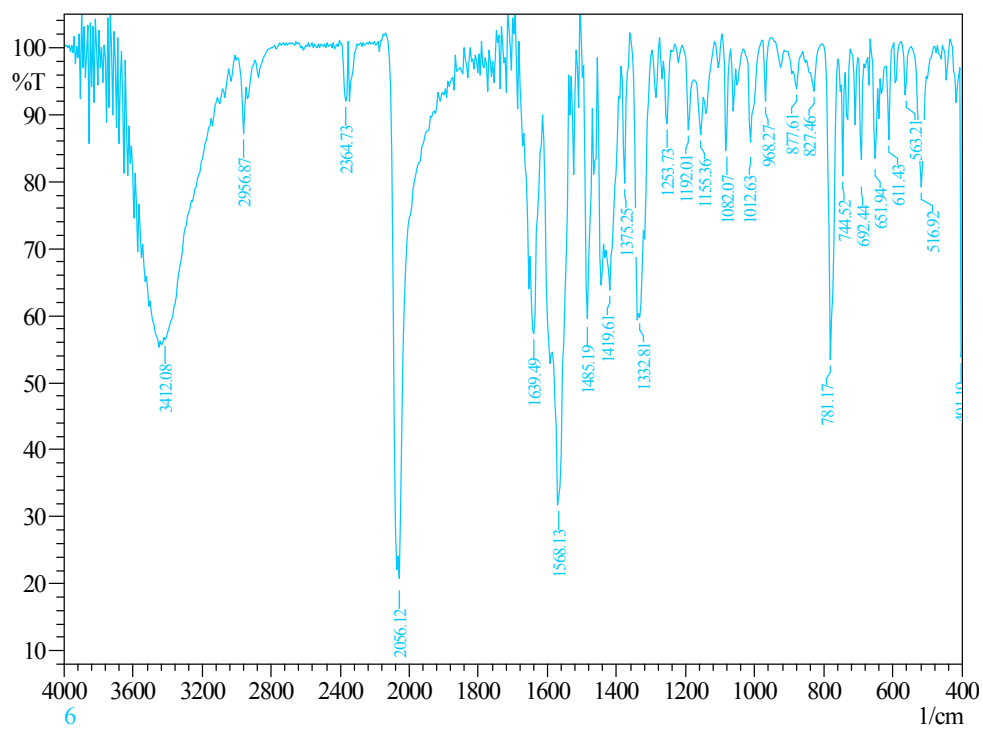

Figure S6. FT-IR spectrum of compound 6.



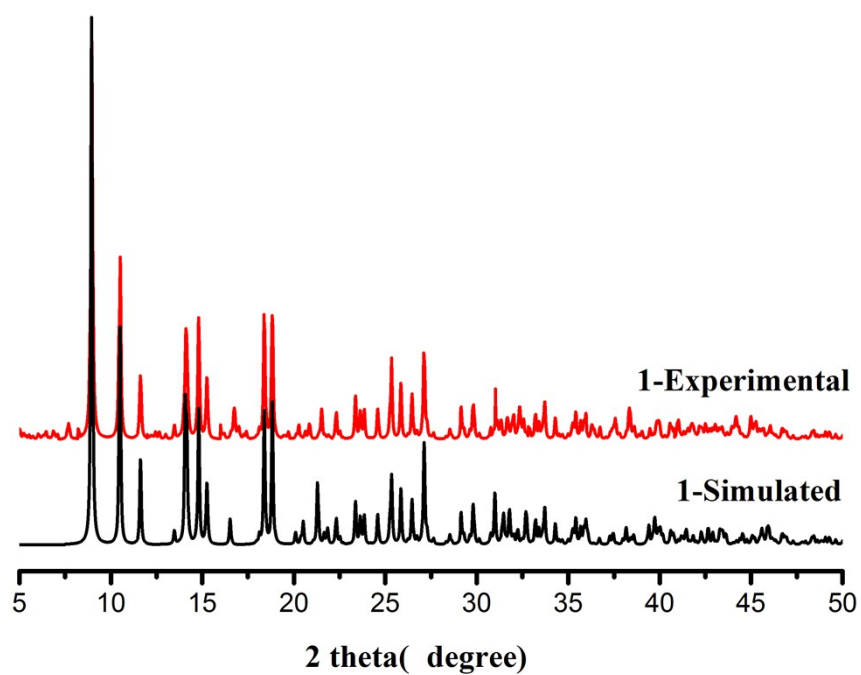

Figure S7 The simulated X-ray powder diffraction patterns (black) and the experimental one (red) of compound 1.

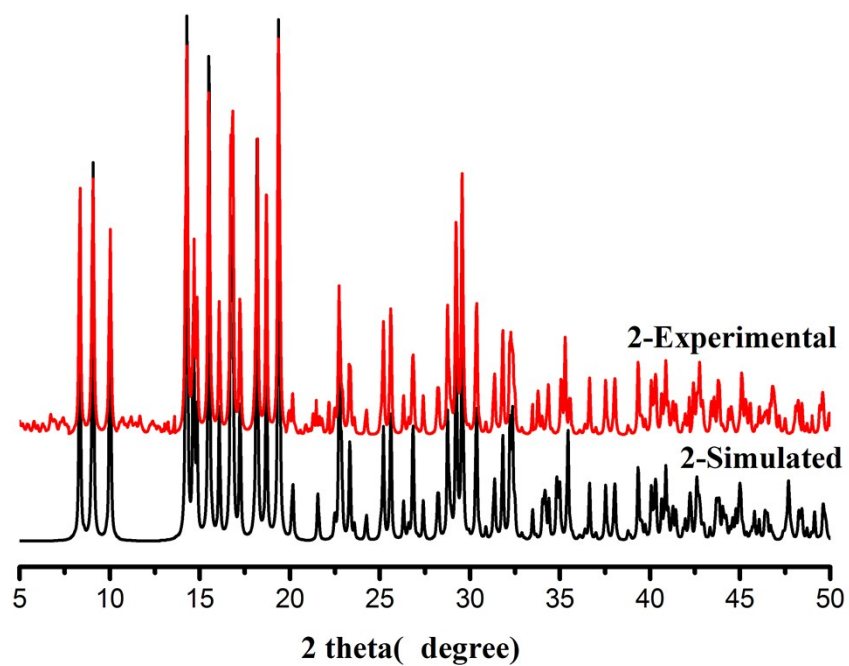

Figure S8 The simulated X-ray powder diffraction patterns (black) and the experimental one (red) of compound 2.

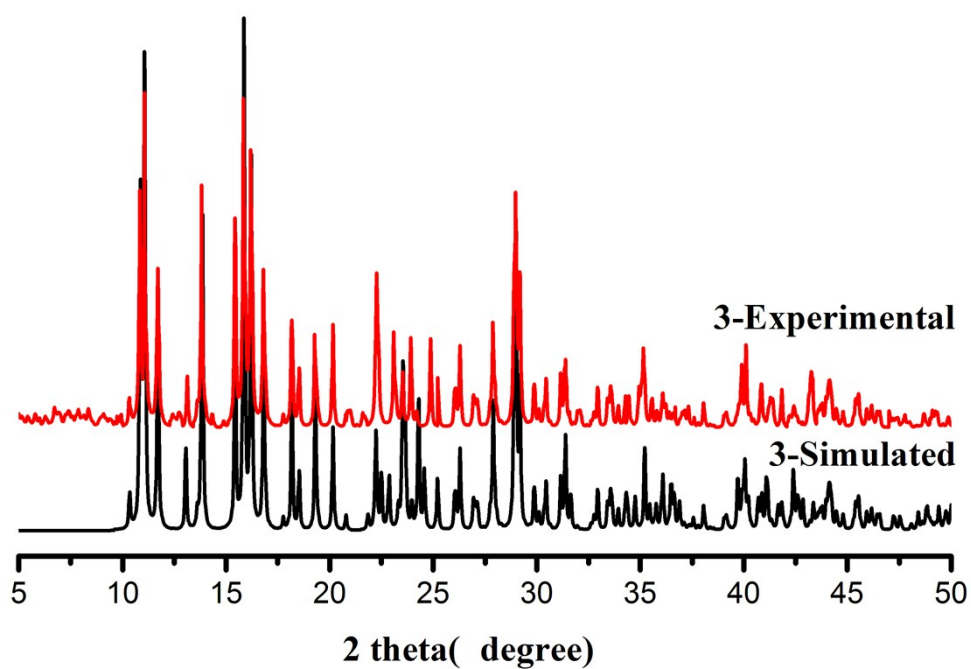

Figure S9 The simulated X-ray powder diffraction patterns (black) and the experimental one (red) of compound 3.

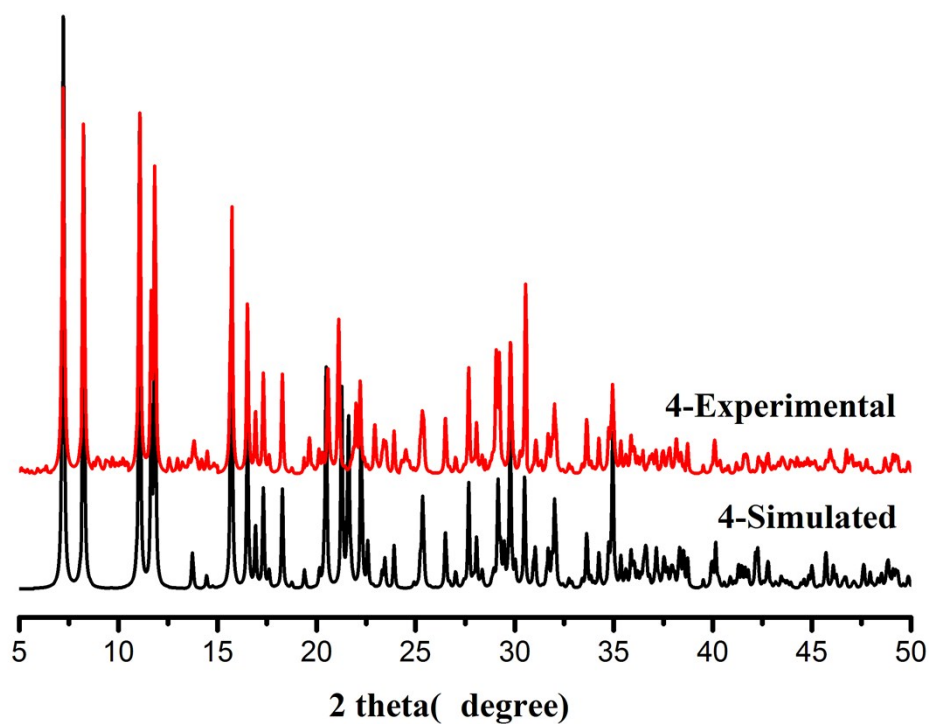

Figure S10 The simulated X-ray powder diffraction patterns (black) and the experimental one (red) of compound 4.

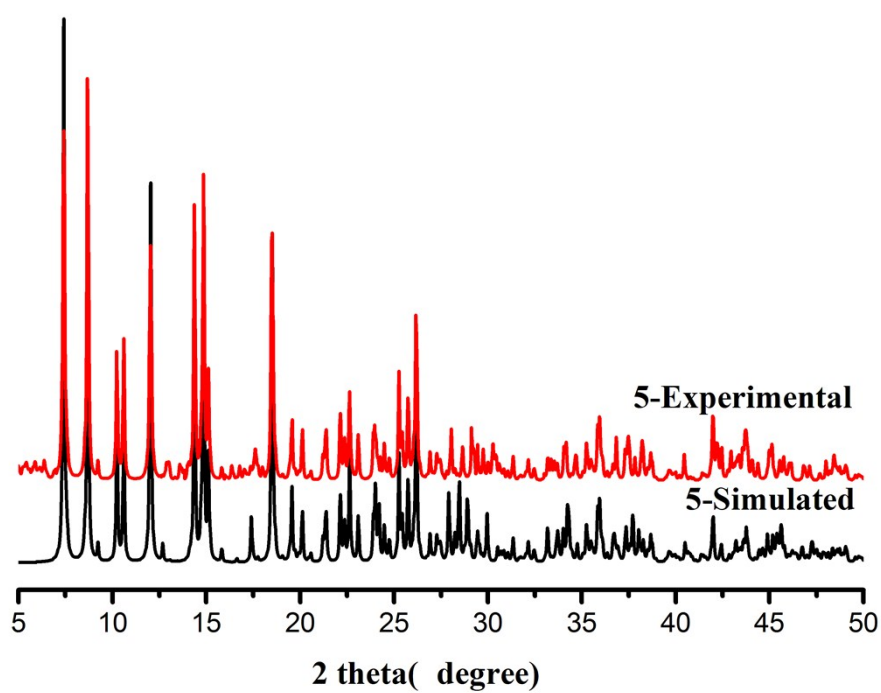

Figure S11 The simulated X-ray powder diffraction patterns (black) and the experimental one (red) of compound 5.

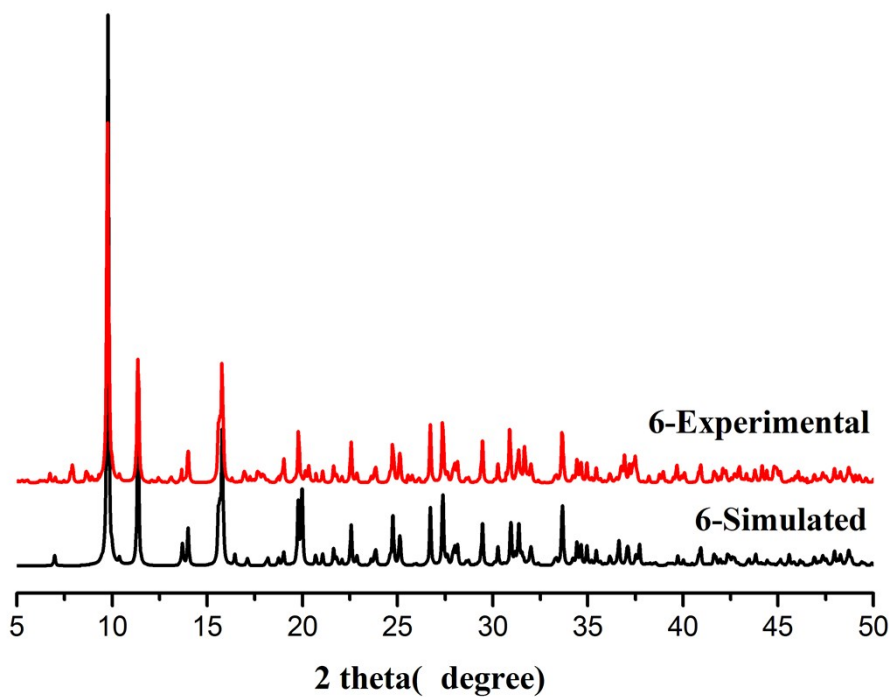

Figure S12 The simulated X-ray powder diffraction patterns (black) and the experimental one (red) of compound 6.
